# Supplementary material for: Change in Pain Status and Subsequent Opioid and Marijuana Use Among Long-Term Adult Survivors of Childhood Cancer
Source: PubMed Central journal article supplement — JNCI Cancer Spectr. 2020 Aug 20;4(6):pkaa070. doi: 10.1093/jncics/pkaa070 (PMC7771010; doi:10.1093/jncics/pkaa070), 2020-08-20

Supplementary Materials

Supplementary Table 1: Characteristics of present study participants and non-participants

| Characteristics                                             | Study participants<br>(N=1,195) | Study non-participants<br>(N=2,081) <sup>c</sup> | Study non-participants<br>(N=1,651) <sup>d</sup> | Study participants vs. non-participants <sup>c</sup> | Study participants vs. non-participants <sup>d</sup> |
|-------------------------------------------------------------|---------------------------------|--------------------------------------------------|--------------------------------------------------|------------------------------------------------------|------------------------------------------------------|
|                                                             | No. (%)                         | No. (%)                                          | No. (%)                                          | X <sup>2</sup> - or t-statistics (P-value)           | X <sup>2</sup> - or t-statistics (P-value)           |
| Pain status at T1 <sup>a</sup>                              |                                 |                                                  |                                                  |                                                      |                                                      |
| Significant pain (SF-36 pain scale scores <40)              | 187 (15.65)                     | N/A                                              | 298 (18.29)                                      | N/A                                                  | .07                                                  |
| Non-significant pain (SF-36 pain scale scores ≥40)          | 1,008 (84.35)                   | N/A                                              | 1,331 (81.71)                                    | N/A                                                  |                                                      |
| Substance use at T1                                         |                                 |                                                  |                                                  |                                                      |                                                      |
| Opioid                                                      | 60 (5.02)                       | N/A                                              | 107 (6.48)                                       | N/A                                                  | .10                                                  |
| Marijuana                                                   | 103 (8.68)                      | N/A                                              | 246 (15.06)                                      | N/A                                                  | <.0001                                               |
| Age at T1 in years, mean (SD)                               | 33.62 (7.92)                    | 30.06 (8.72)                                     | 30.55 (8.35)                                     | <.0001                                               | <.0001                                               |
| <18 years                                                   | 0 (0)                           | 38 (1.83)                                        | 0 (0)                                            | <.0001                                               | <.0001                                               |
| 18 – 29.9 years                                             | 431 (36.07)                     | 1123 (53.96)                                     | 879 (53.24)                                      |                                                      |                                                      |
| 30 – 39.9 years                                             | 497 (41.59)                     | 639 (30.71)                                      | 546 (33.07)                                      |                                                      |                                                      |
| ≥ 40 years                                                  | 267 (22.34)                     | 281 (13.50)                                      | 226 (13.69)                                      |                                                      |                                                      |
| Time since cancer diagnosis in years, mean (SD)             | 24.66 (7.94)                    | 22.12 (8.36)                                     | 22.46 (8.18)                                     | <.0001                                               | <.0001                                               |
| <10 years                                                   | 0 (0)                           | 24 (1.15)                                        | 0 (0)                                            | <.0001                                               | <.0001                                               |
| 10 – 19.9 years                                             | 370 (30.96)                     | 964 (46.32)                                      | 754 (45.67)                                      |                                                      |                                                      |
| 20 – 29.9 years                                             | 512 (42.85)                     | 695 (33.40)                                      | 569 (34.46)                                      |                                                      |                                                      |
| ≥ 30 years                                                  | 313 (26.19)                     | 398 (19.13)                                      | 328 (19.87)                                      |                                                      |                                                      |
| Interval between T1 and T2 <sup>b</sup> in years, mean (SD) | 4.22 (1.34)                     | N/A                                              | N/A                                              | N/A                                                  | N/A                                                  |
| Sex                                                         |                                 |                                                  |                                                  |                                                      |                                                      |
| Male                                                        | 560 (46.86)                     | 1154 (55.45)                                     | 883 (53.48)                                      | <.0001                                               | .0005                                                |
| Female                                                      | 635 (53.14)                     | 927 (44.55)                                      | 768 (46.52)                                      |                                                      |                                                      |
| Race/ethnicity                                              |                                 |                                                  |                                                  |                                                      |                                                      |
| Non-Hispanic white                                          | 1,028 (86.03)                   | 1658 (79.67)                                     | 1327 (80.38)                                     | <.0001                                               | <.0001                                               |
| Other                                                       | 167 (13.97)                     | 423 (20.33)                                      | 324 (19.62)                                      |                                                      |                                                      |
| Education level                                             |                                 |                                                  |                                                  |                                                      |                                                      |
| Below high school (HS)                                      | 80 (7.06)                       | 203 (11.59)                                      | 150 (9.83)                                       | <.0001                                               | <.0001                                               |

|                                         |             |              |              |        |        |
|-----------------------------------------|-------------|--------------|--------------|--------|--------|
| HS graduate/general education diploma   | 244 (21.54) | 496 (28.33)  | 391 (25.62)  |        |        |
| Some college/training after high school | 316 (27.89) | 553 (31.58)  | 511 (33.49)  |        |        |
| College graduate and above              | 493 (43.51) | 499 (28.50)  | 474 (31.06)  |        |        |
| Annual household income at T1           |             |              |              |        |        |
| < \$39,999                              | 430 (41.23) | 750 (47.68)  | 627 (46.10)  | .01    | .06    |
| \$40,000 – \$79,999                     | 358 (34.32) | 482 (30.64)  | 428 (31.47)  |        |        |
| ≥ \$80,000                              | 255 (24.45) | 341 (21.68)  | 305 (22.43)  |        |        |
| Marital status at T1                    |             |              |              |        |        |
| Married/living with a partner           | 639 (55.18) | 816 (43.82)  | 747 (46.40)  | <.0001 | <.0001 |
| Status other than married               | 519 (44.82) | 1046 (56.18) | 863 (53.60)  |        |        |
| Health insurance at T1                  |             |              |              |        |        |
| Insured                                 | 934 (79.69) | 1424 (76.07) | 1224 (75.56) | .02    | .01    |
| Uninsured                               | 238 (20.31) | 448 (23.93)  | 396 (24.44)  |        |        |
| Cancer diagnosis                        |             |              |              |        |        |
| Acute lymphoblastic leukemia            | 452 (37.82) | 594 (28.54)  | 474 (28.71)  | <.0001 | <.0001 |
| Other leukemia                          | 47 (3.93)   | 100 (4.80)   | 78 (4.73)    |        |        |
| Hodgkin lymphoma                        | 198 (16.57) | 190 (9.13)   | 162 (9.81)   |        |        |
| Non-Hodgkin lymphoma                    | 61 (5.1)    | 173 (8.31)   | 147 (8.90)   |        |        |
| Central nervous system malignancy       | 86 (7.20)   | 274 (13.17)  | 168 (10.18)  |        |        |
| Sarcomas                                | 142 (11.88) | 197 (9.47)   | 162 (9.81)   |        |        |
| Wilms tumor                             | 74 (6.19)   | 142 (6.82)   | 121 (7.33)   |        |        |
| Neuroblastoma                           | 46 (3.85)   | 102 (4.90)   | 82 (4.97)    |        |        |
| Retinoblastoma                          | 31 (2.59)   | 70 (3.36)    | 52 (3.15)    |        |        |
| Other solid malignancies                | 58 (4.83)   | 239 (11.48)  | 205 (12.42)  |        |        |
| History of cancer therapies             |             |              |              |        |        |
| Steroid                                 | 609 (50.96) | 898 (43.15)  | 725 (43.91)  | <.0001 | .0002  |
| Vincristine                             | 871 (72.89) | 1372 (65.93) | 1086 (65.78) | <.0001 | <.0001 |
| Major surgery                           | 821 (68.70) | 1512 (72.66) | 1196 (72.44) | .02    | .03    |

<sup>a</sup> T1: the time point when survivors completed baseline medical evaluation and self-reported health survey.

<sup>b</sup> T2: the time point when survivors completed a follow-up evaluation and self-reported health survey.

<sup>c</sup> Defined as 2,081 survivors who completed medical evaluation, but did not complete self-reported health survey at both T1 and T2 or had used both opioid and marijuana at T2 (non-convergence issue due to small sample size).

<sup>d</sup> Defined as 1,651 survivors who completed self-reported health survey at T1 only, or used both opioid and marijuana at T2.

Supplementary Table 2: Change status of significant pain, depression, and anxiety from T1<sup>a</sup> to T2<sup>b</sup>

| Change Status                                                      | No. (%)       |
|--------------------------------------------------------------------|---------------|
| Change of significant pain status from T1 to T2 <sup>c</sup>       |               |
| None/decreased                                                     | 971 (81.26)   |
| Persistent/increased                                               | 224 (18.74)   |
| Change of significant depression status from T1 to T2 <sup>c</sup> |               |
| None/decreased                                                     | 1,015 (86.98) |
| Persistent/increased                                               | 152 (13.02)   |
| Change of significant anxiety status from T1 to T2 <sup>c</sup>    |               |
| None/decreased                                                     | 1,048 (89.88) |
| Persistent/increased                                               | 118 (10.12)   |

<sup>a</sup> T1: the time point when survivors completed baseline medical evaluation and self-reported health survey.

<sup>b</sup> T2: the time point when survivors completed a follow-up evaluation and self-reported health survey.

<sup>c</sup> Significant status: SF-36 bodily pain T-score <40 and Brief Symptom Inventory-18 depression and anxiety T-scores ≥63.

Supplementary Table 3: Status of opioid and marijuana use at T1<sup>a</sup> and/or T2<sup>b</sup>

| Substance use                           | No. (%)       |
|-----------------------------------------|---------------|
| Opioid use at T1 and/or T2              |               |
| None                                    | 1,093 (91.46) |
| T1 only                                 | 44 (3.68)     |
| T2 only                                 | 42 (3.51)     |
| T1 and T2                               | 16 (1.34)     |
| Marijuana use at T1 and/or T2           |               |
| None                                    | 1,034 (88.07) |
| T1 only                                 | 35 (2.98)     |
| T2 only                                 | 39 (3.32)     |
| T1 and T2                               | 66 (5.62)     |
| Opioid and/or marijuana use at T2 alone |               |
| None                                    | 1,018 (86.20) |
| Opioid only                             | 57 (4.83)     |
| Marijuana only                          | 106 (8.98)    |

<sup>a</sup> T1: the time point when survivors completed baseline medical evaluation and self-reported health survey.

<sup>b</sup> T2: the time point when survivors completed a follow-up evaluation and self-reported health survey.

Supplementary Figure 1: Study participants and sample selection

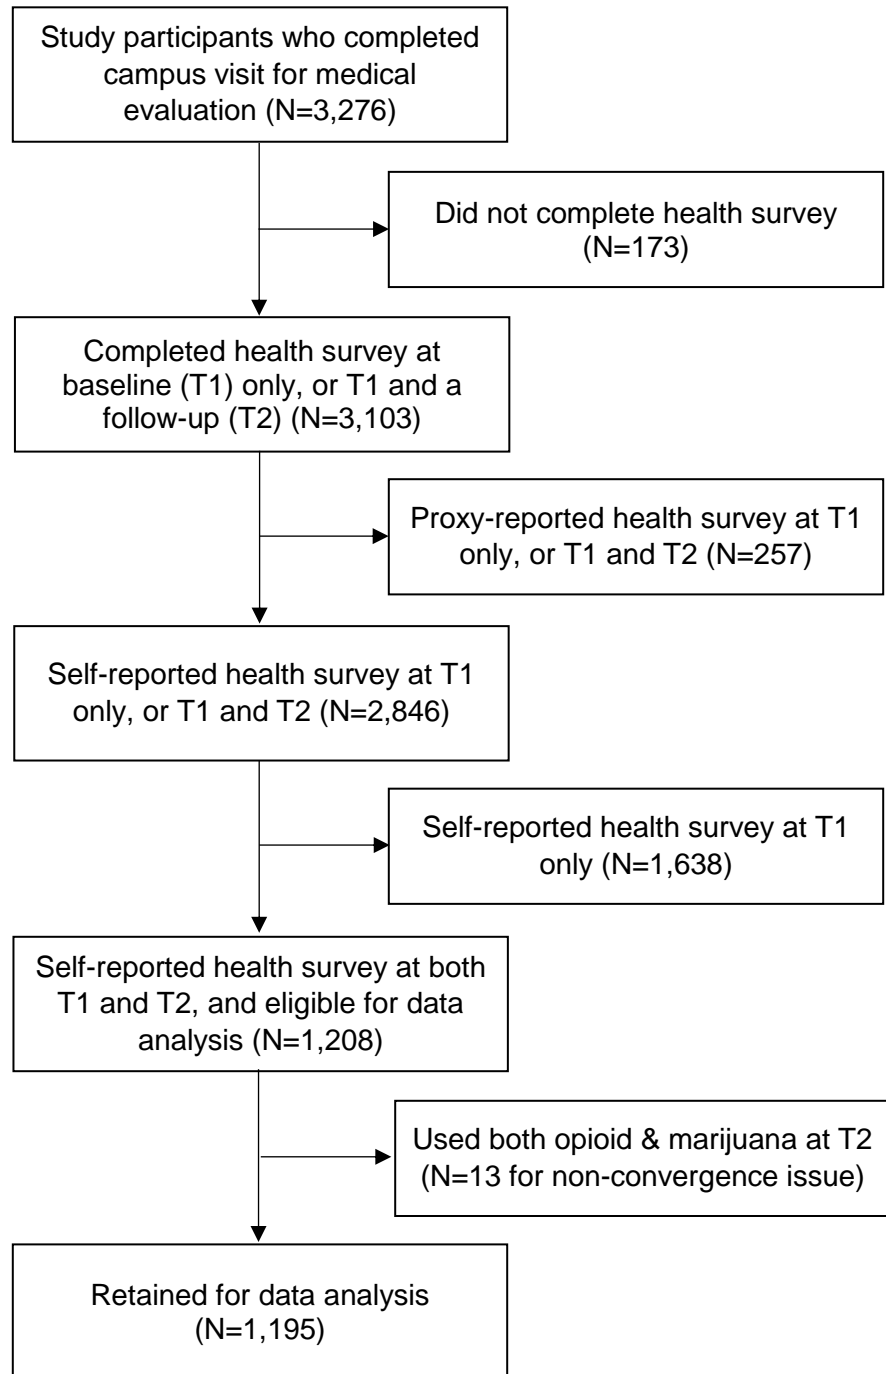

Supplement: pkaa070_supplementary_data.pdf [file pkaa070_supplementary_data.pdf]
